# Supplementary material for: Y-Chromosome Structural Diversity in the Bonobo and Chimpanzee Lineages
Source: PubMed Central journal article supplement — Genome Biol Evol. 2016 Jun 29;8(7):2231–40. doi: 10.1093/gbe/evw150 (PMC4987114; doi:10.1093/gbe/evw150), 2016-06-29
Supplement: supp_evw150_SuppFigures.pdf [file supp_evw150_SuppFigures.pdf]

# Supp. Figure 1

A. Blue Arms

European  
African  
Asian

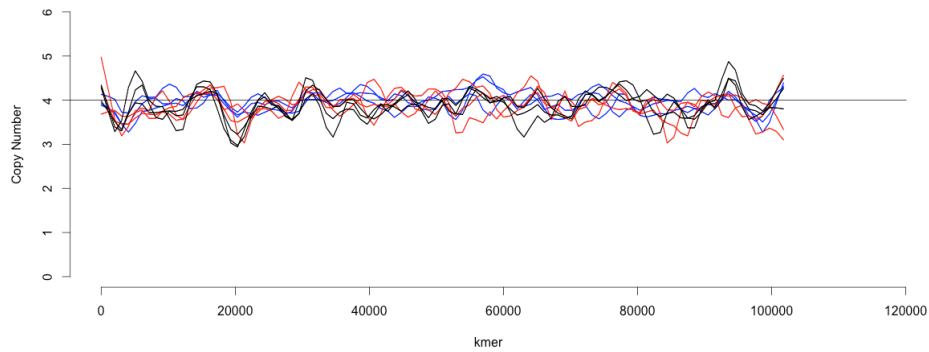

Red Arms

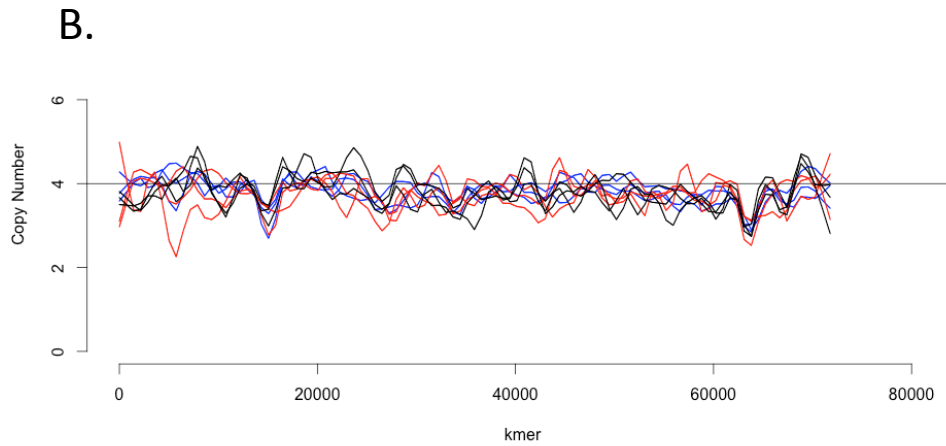

■ European  
■ African  
■ Asian

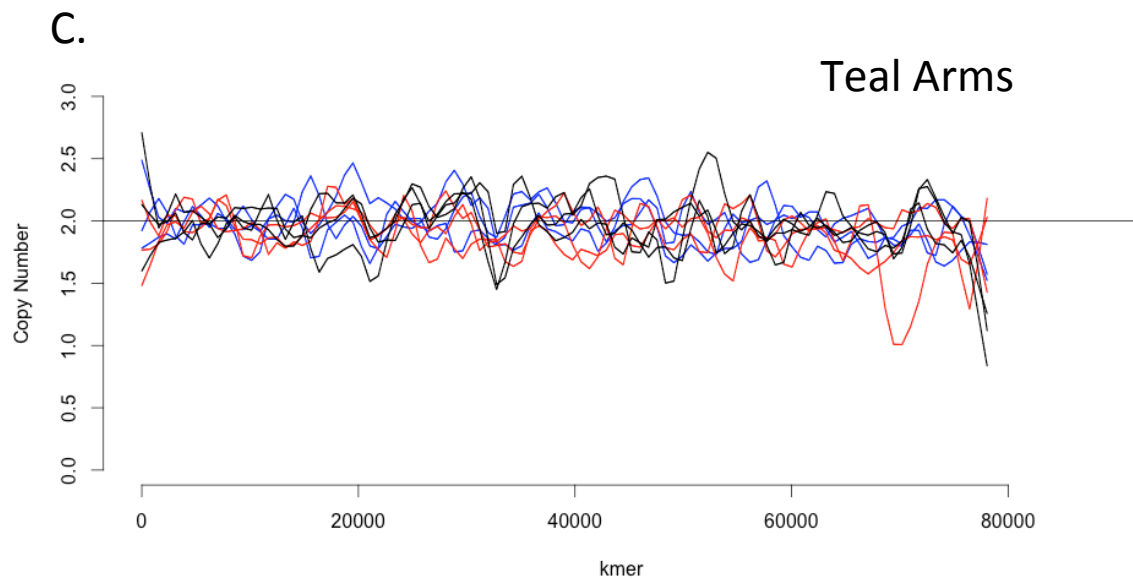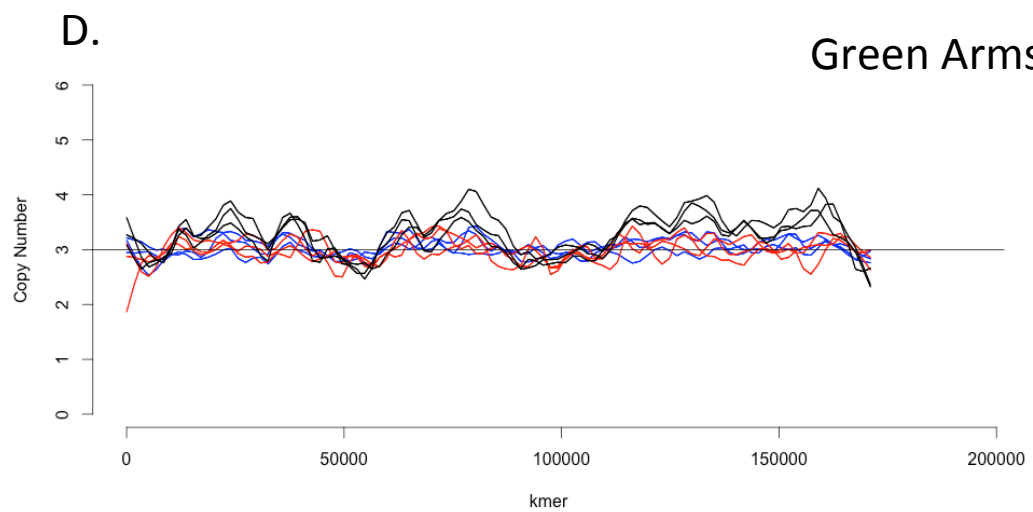

- European
- African
- Asian

E.

### Yellow Arms

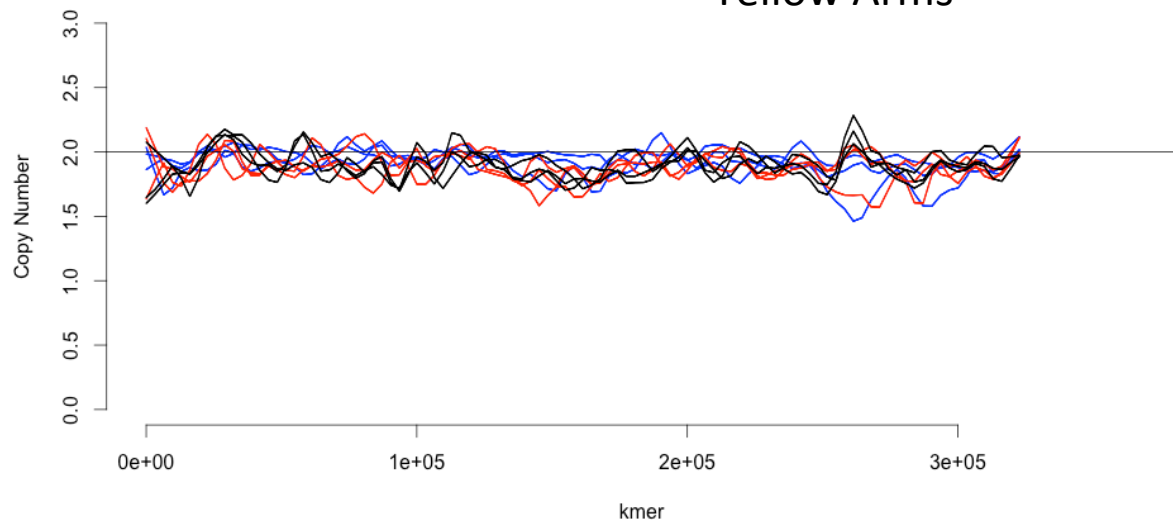

# Supp. Figure 2

A.

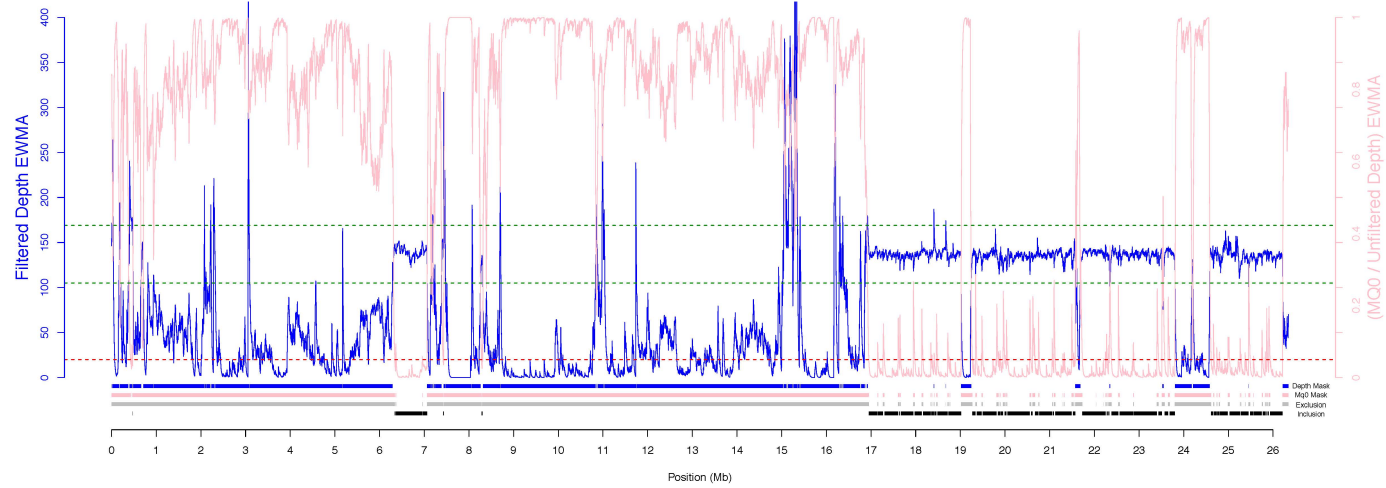

B.

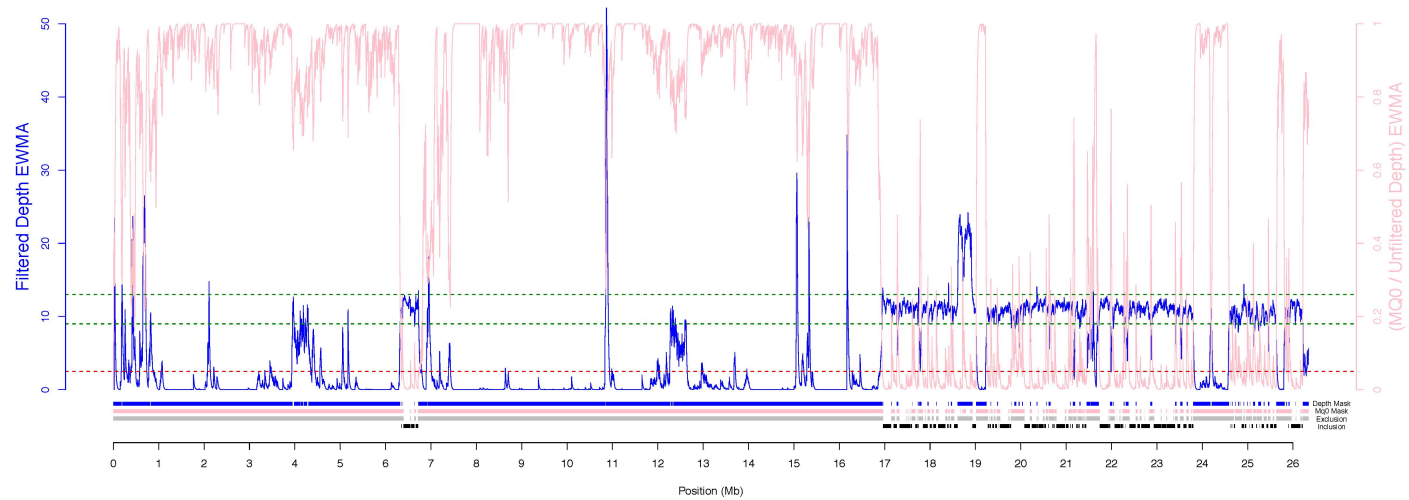

# Supp. Figure 3

A.

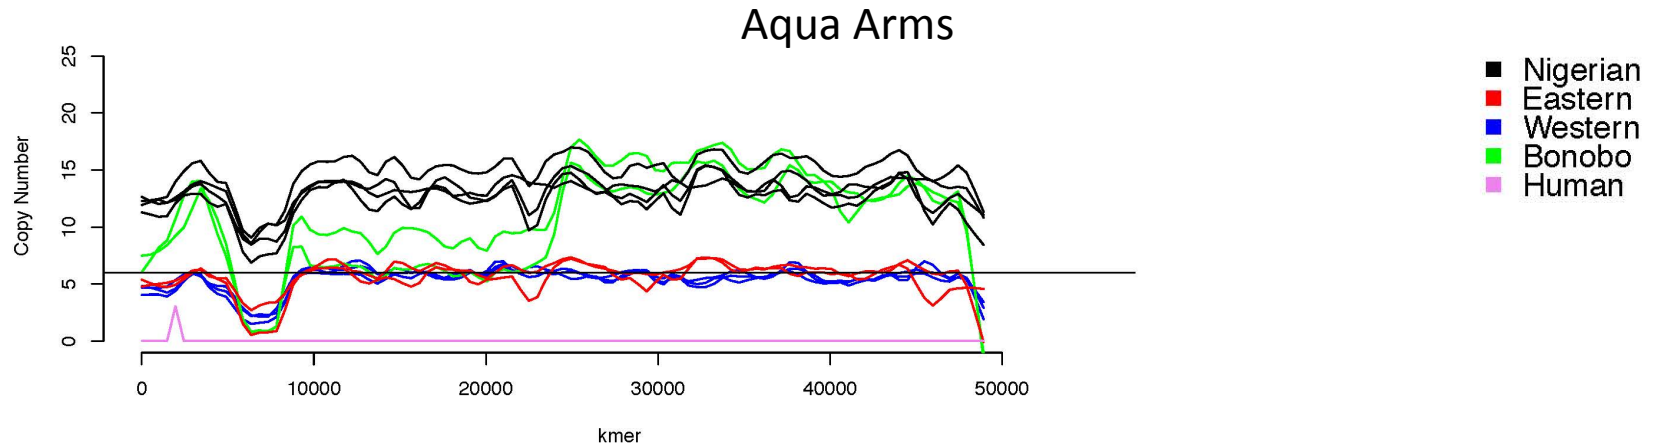

B.

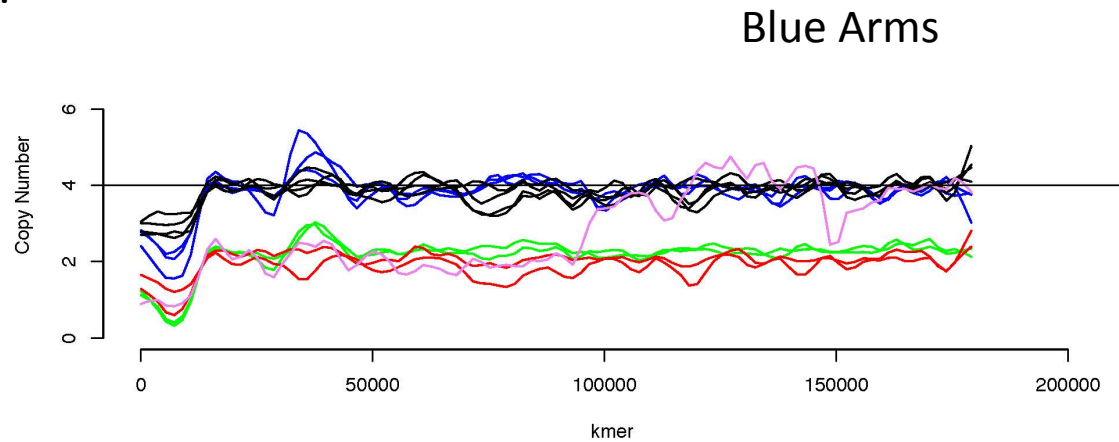

- Nigerian
- Eastern
- Western
- Bonobo
- Human

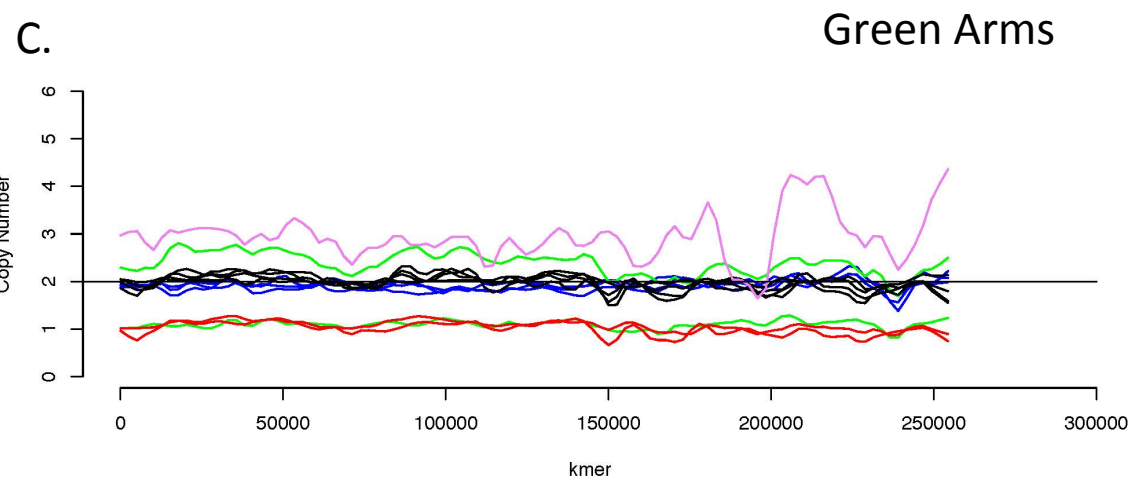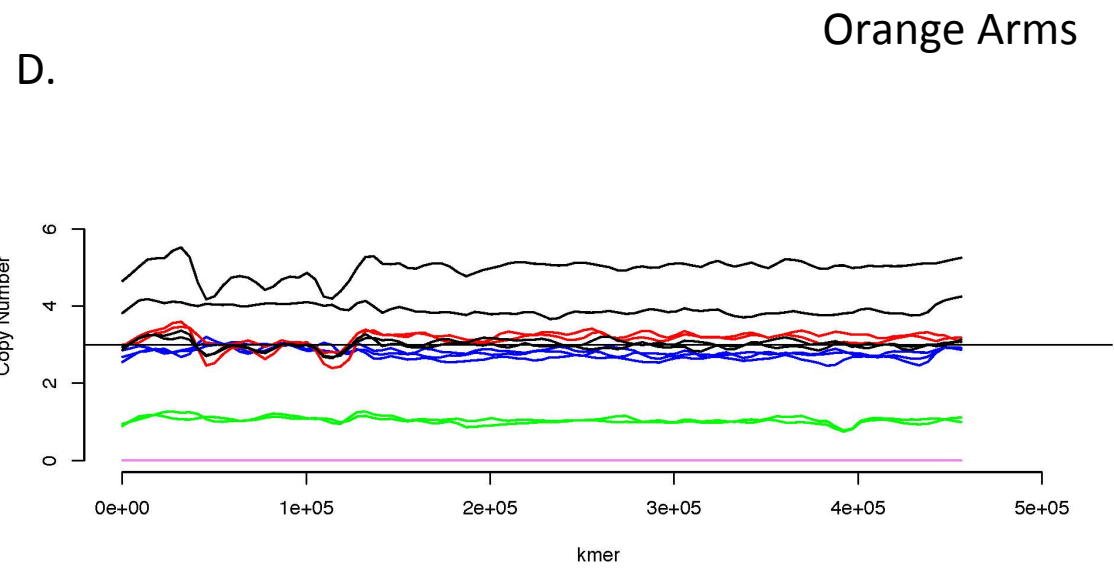

- Nigerian
- Eastern
- Western
- Bonobo
- Human

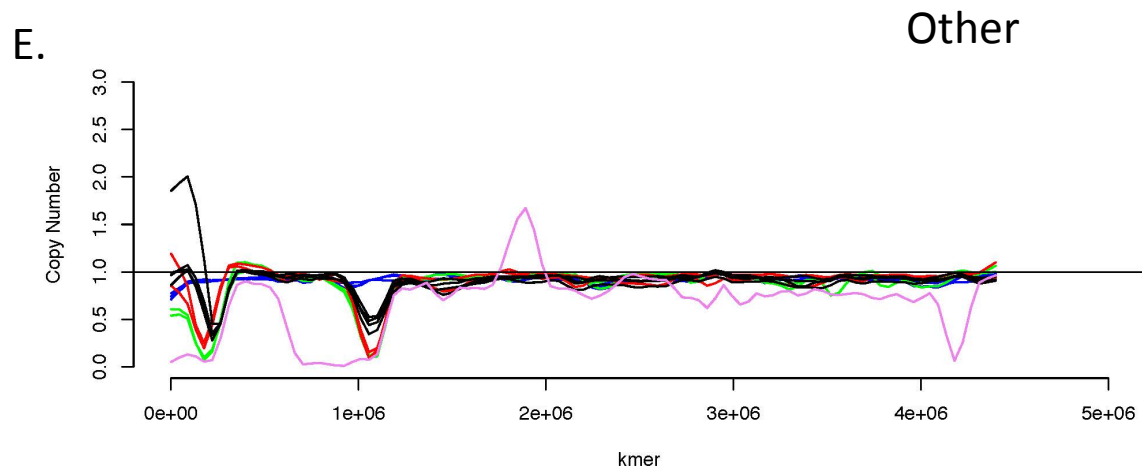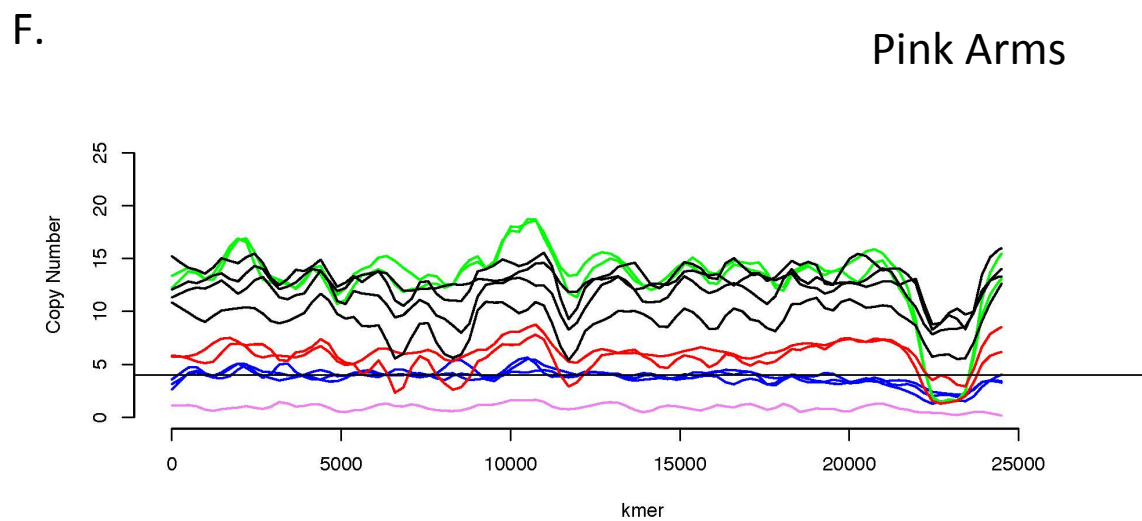

- Nigerian
- Eastern
- Western
- Bonobo
- Human

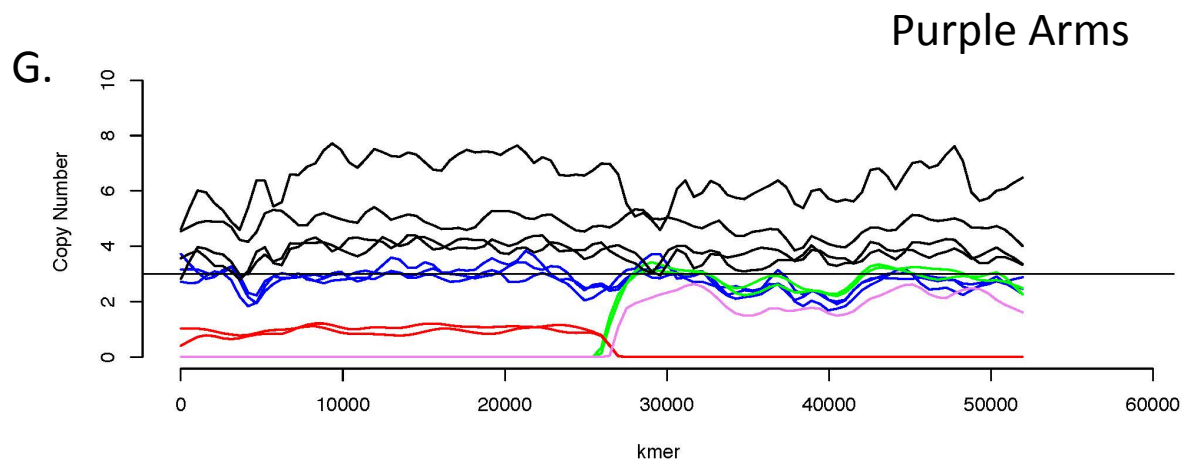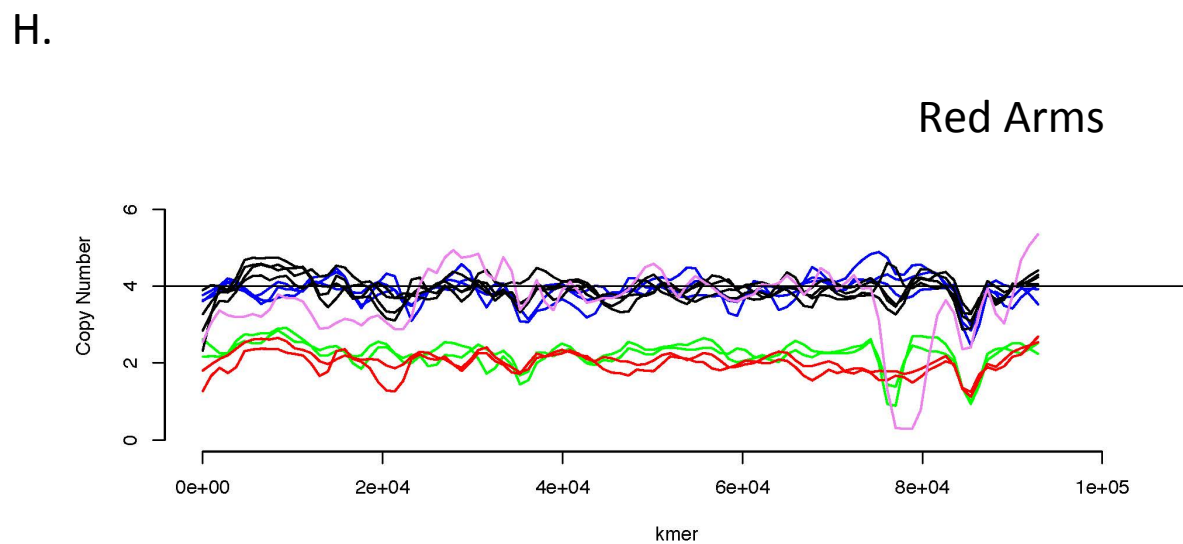



- Nigerian
- Eastern
- Western
- Bonobo
- Human

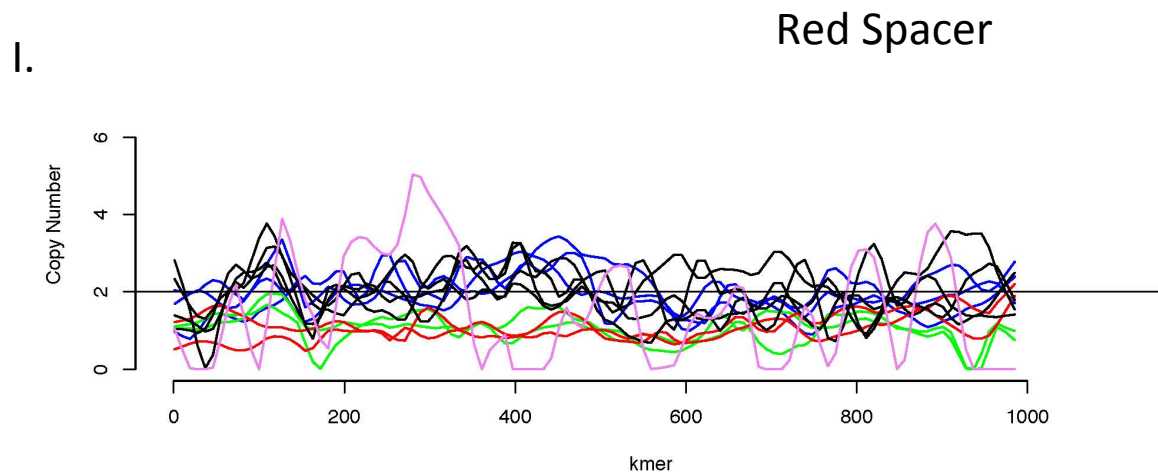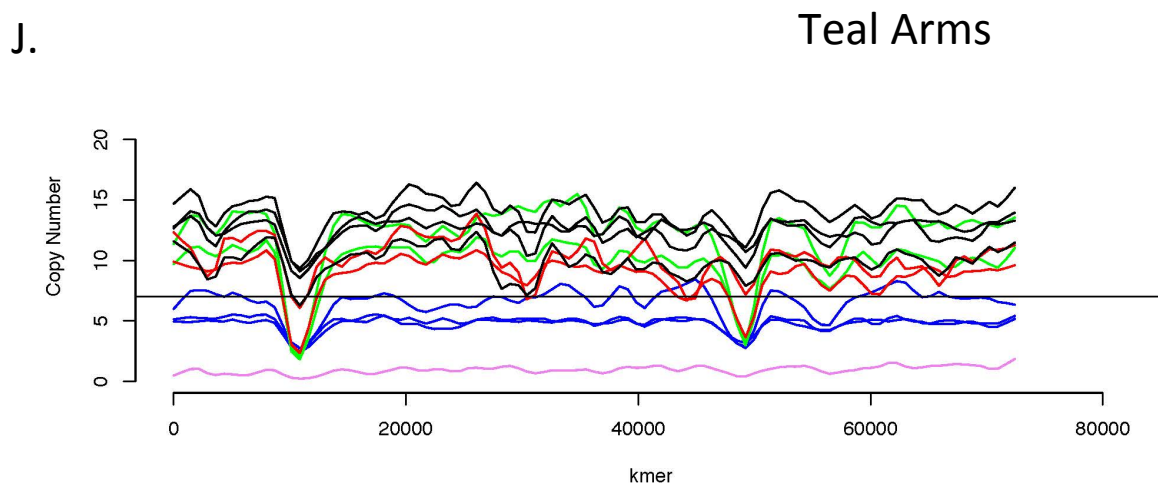

- Nigerian
- Eastern
- Western
- Bonobo
- Human

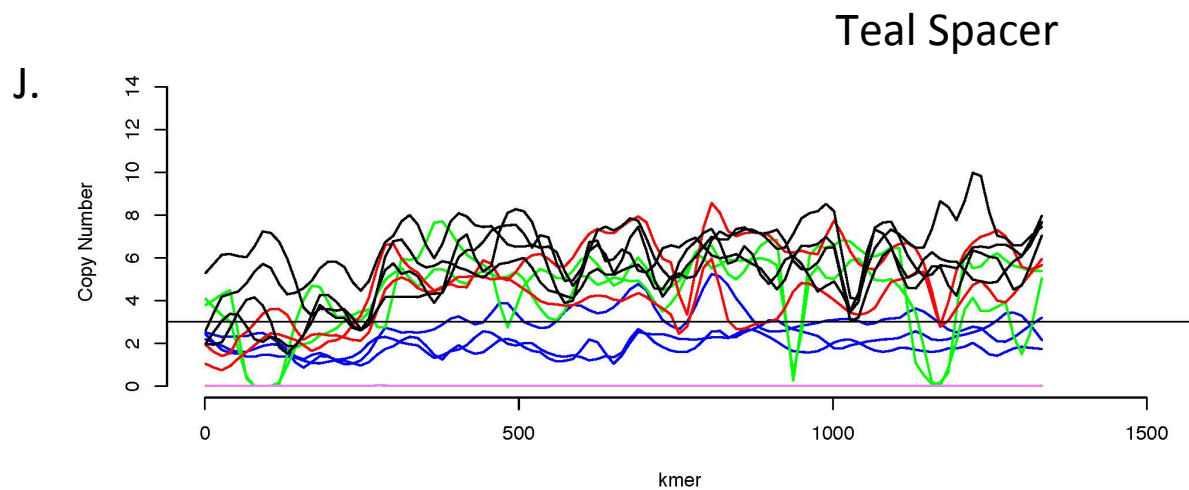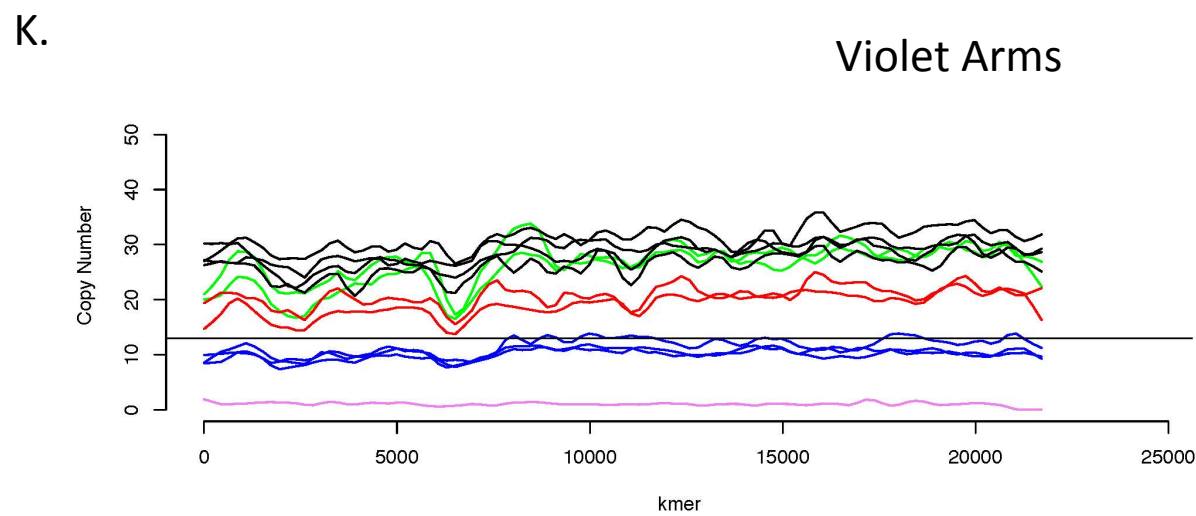

- Nigerian
- Eastern
- Western
- Bonobo
- Human

L.

### Violet Spacer

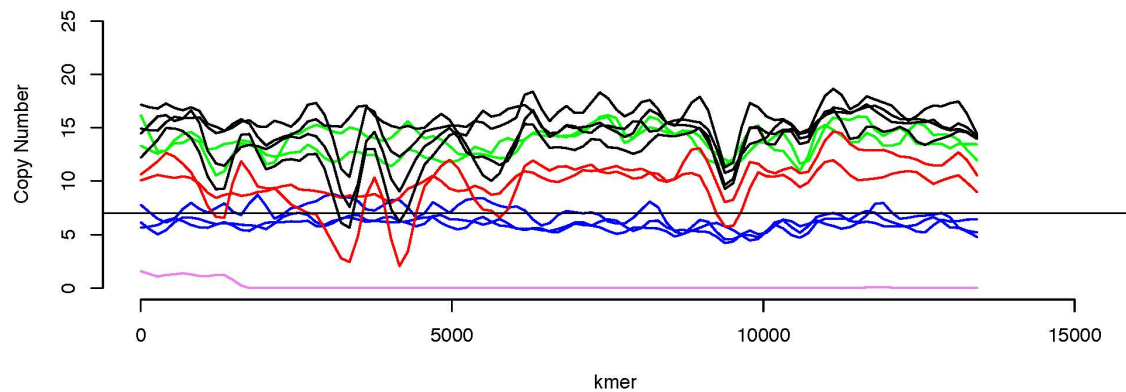

M.

### Yellow Arms

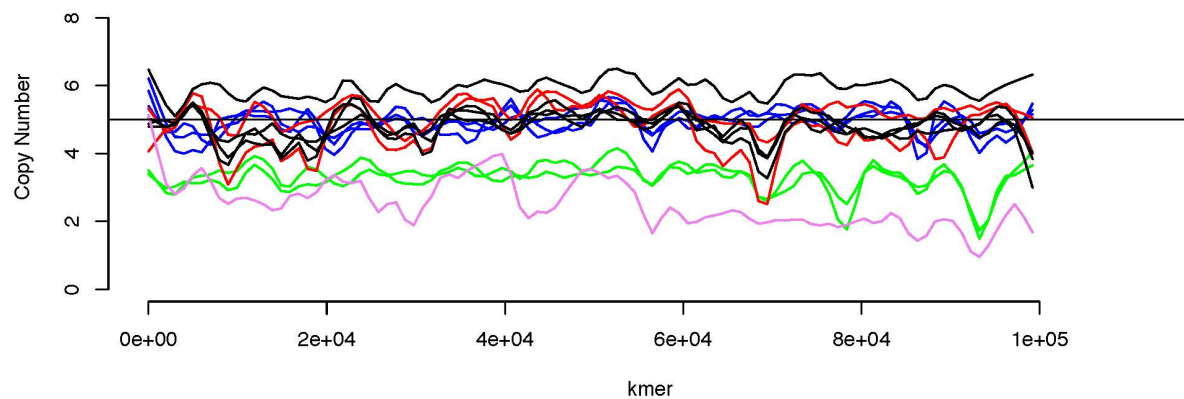

- Nigerian
- Eastern
- Western
- Bonobo
- Human

N. Yellow Spacer (CN 3)

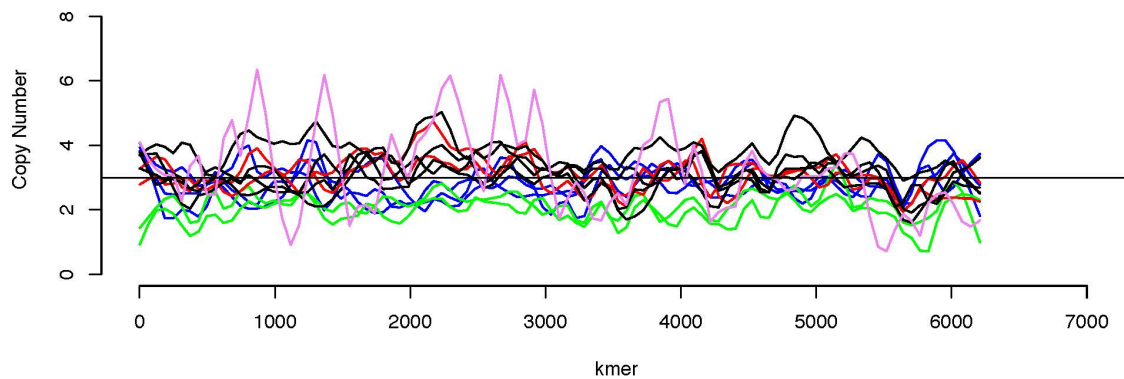

O. Yellow Spacer (CN 2)

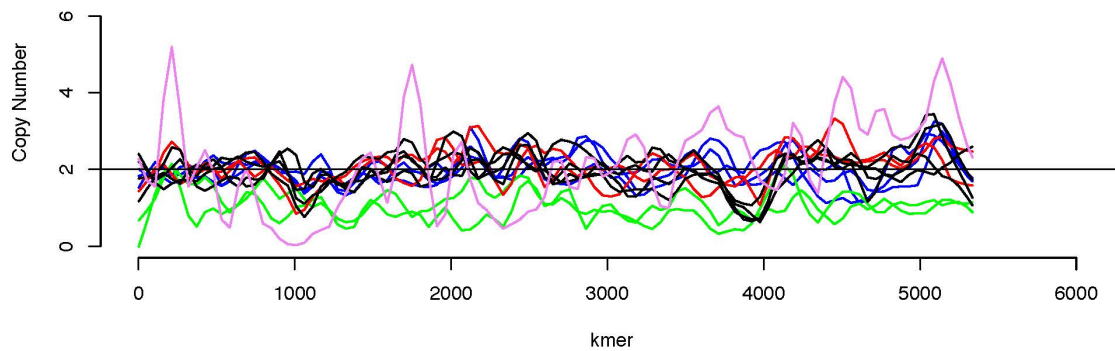

- Nigerian
- Eastern
- Western
- Bonobo
- Human

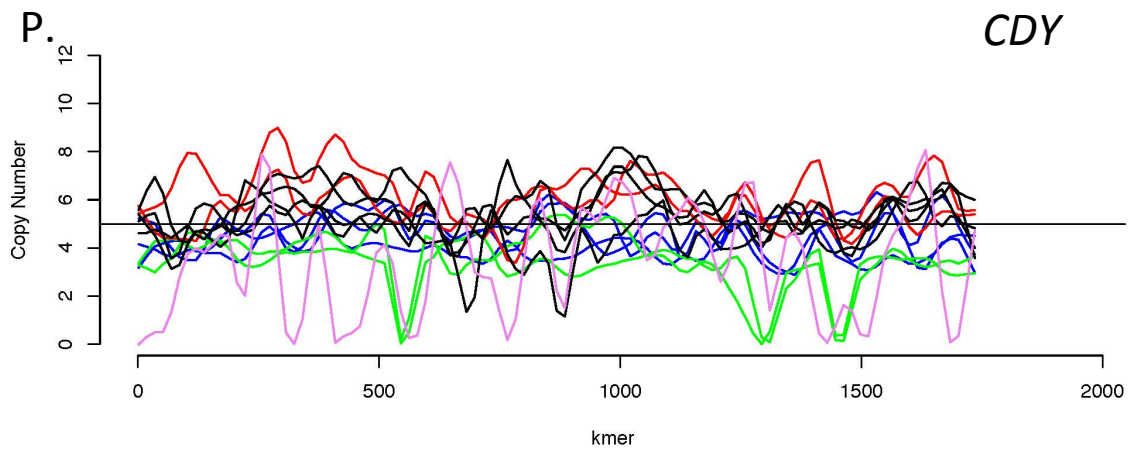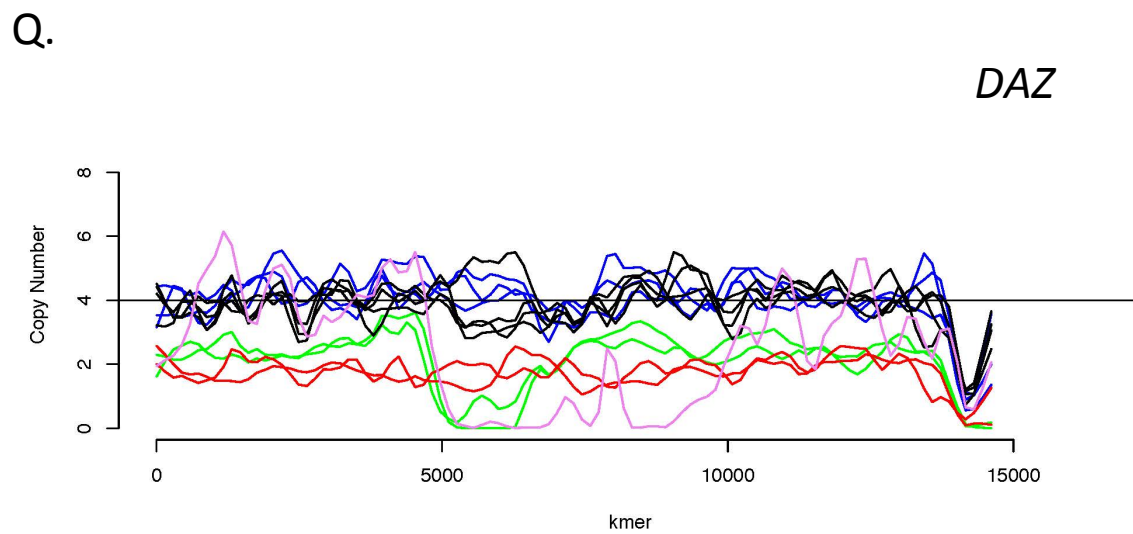

- Nigerian
- Eastern
- Western
- Bonobo
- Human

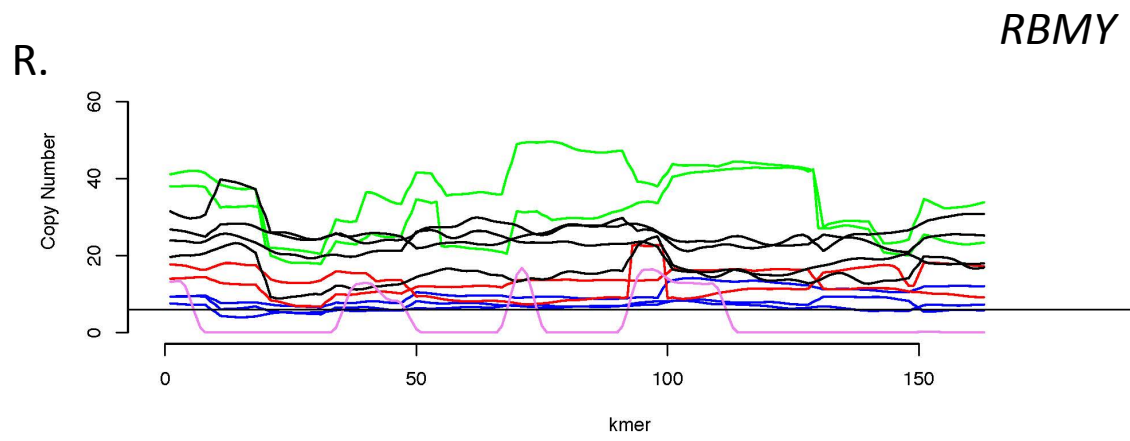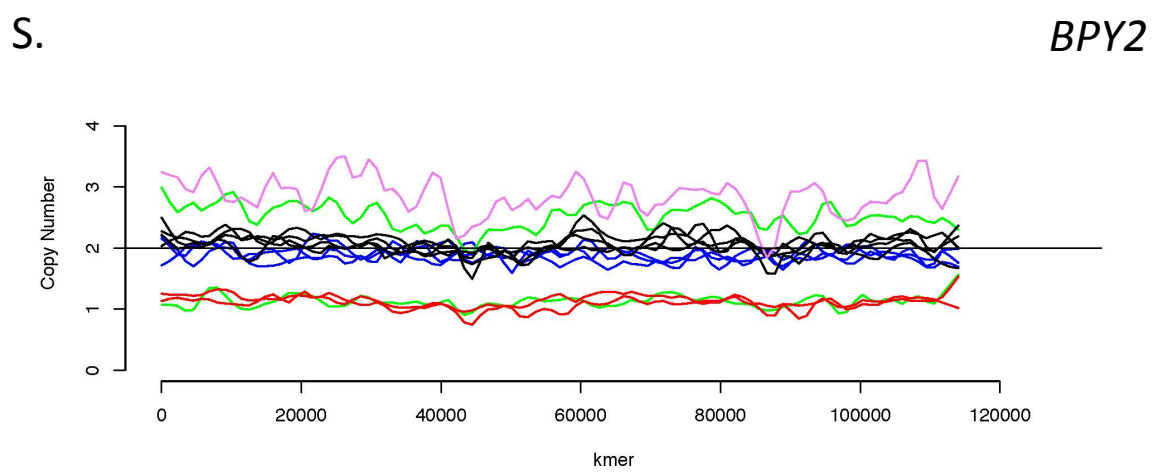

- Nigerian
- Eastern
- Western
- Bonobo
- Human

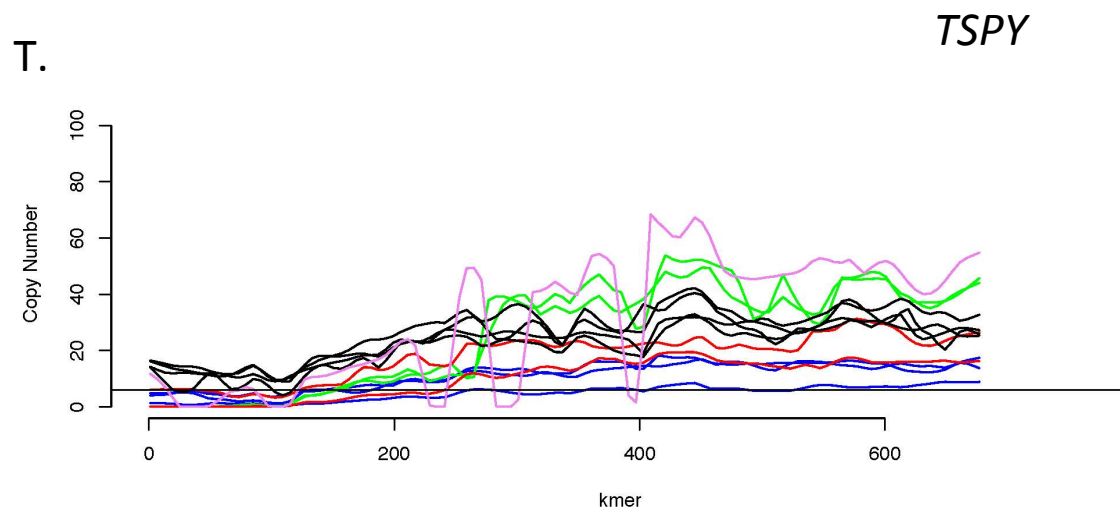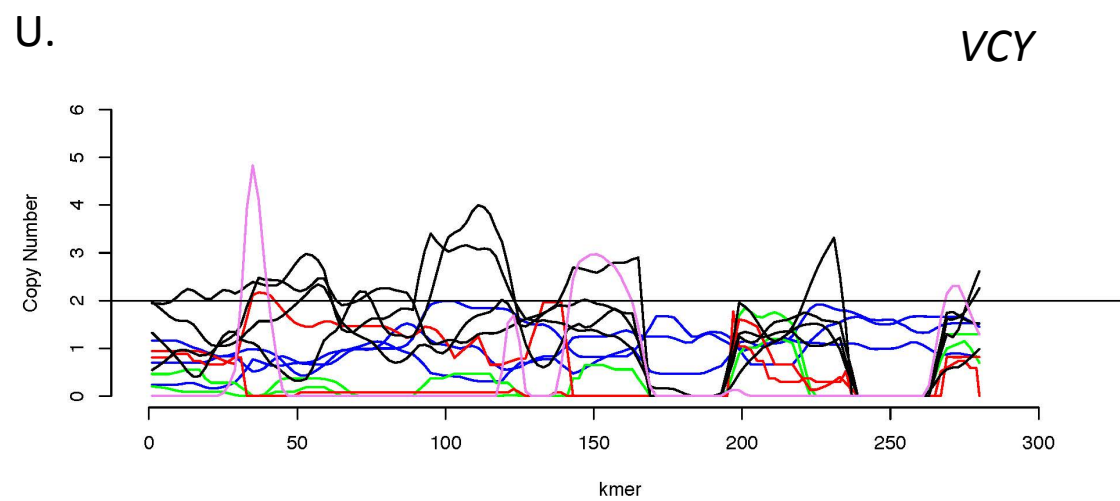

# Supp. Figure 4

A.

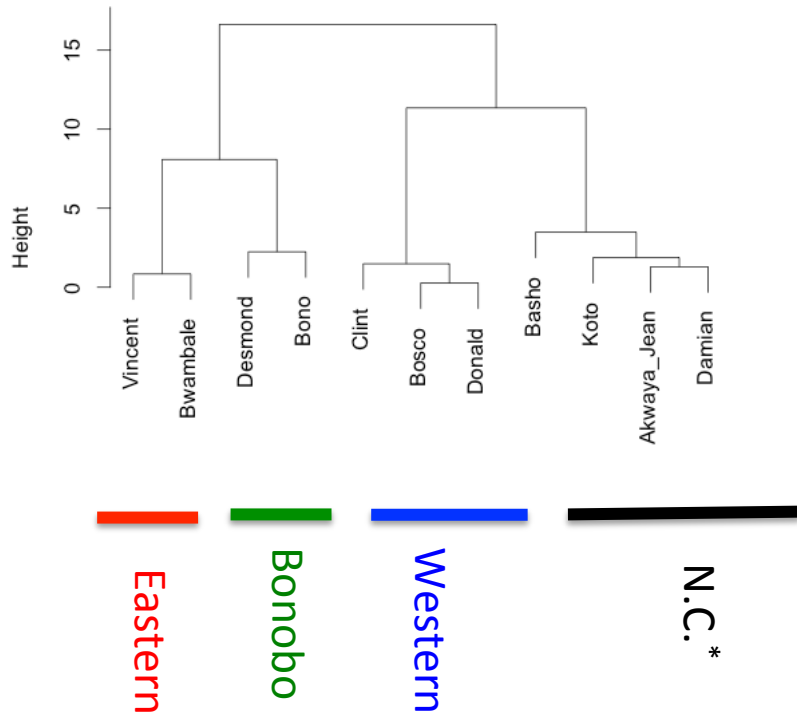

B.

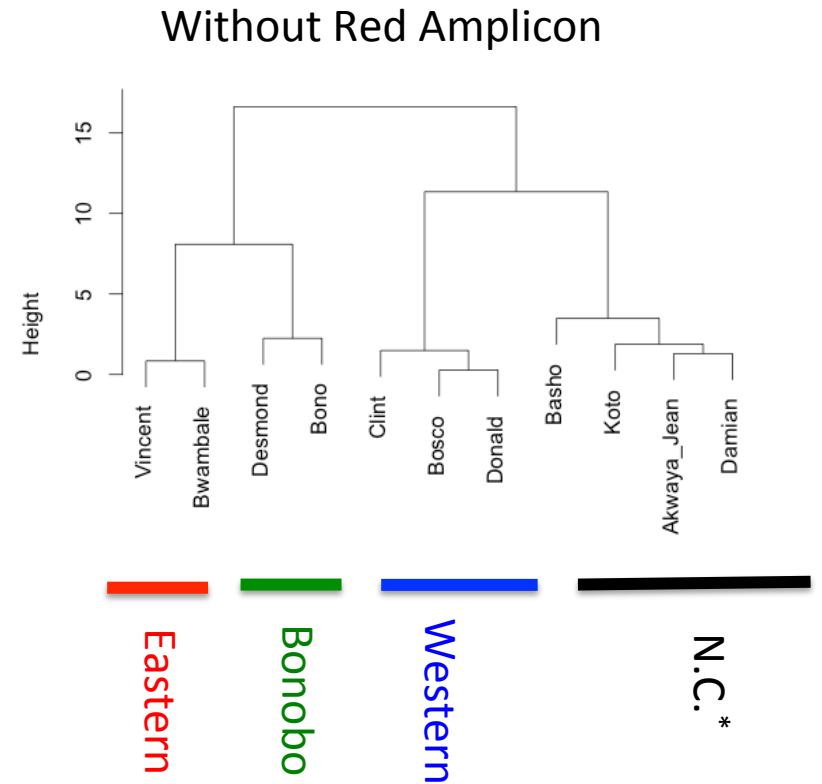

\*N.C. Nigerian-Cameroon
